# Supplementary material for: lncRNA AFAP1-AS1 promotes triple negative breast cancer cell proliferation and invasion via targeting miR-145 to regulate MTH1 expression
Source: PubMed Central journal article supplement (PMC7203232; doi:10.1038/s41598-020-64713-x), 2020-05-06

**lncRNA AFAP1-AS1 promotes triple negative breast cancer cell proliferation and invasion via targeting miR-145 to regulate MTH1 expression**

**Running title:** Oncogenic AFAP1-AS1 in TNBC cells

Xiaohui Zhang, Yidong Zhou, Feng Mao, Yan Lin, Songjie Shen, Qiang Sun

Department of Breast Surgery, Peking Union Medical College Hospital, Peking Union Medical College & Chinese Academy of Medical Sciences (CAMS), Beijing, China.

**Corresponding authors**

Qiang Sun

Department of Breast Surgery, Peking Union Medical College Hospital, Peking Union Medical College & Chinese Academy of Medical Sciences (CAMS), Beijing, China.

E-mail: sunqpumch@163.com

Tel: +86-13811669255

Supplementary information 2

Figure 5 GAPDH

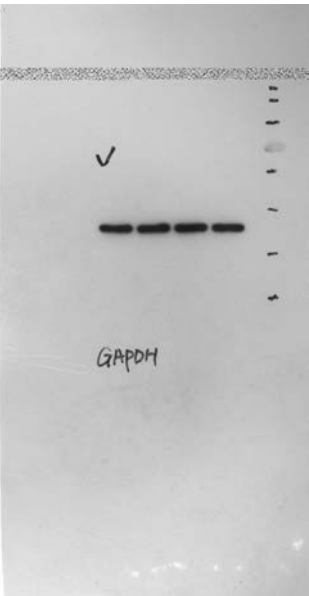

Figure 5 MTH1

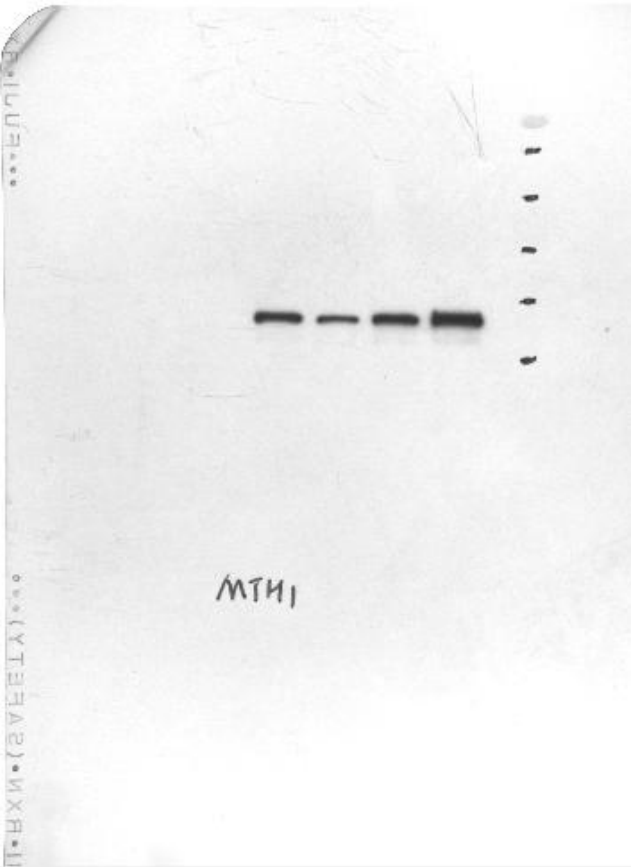

**Figure 6 ATF6**

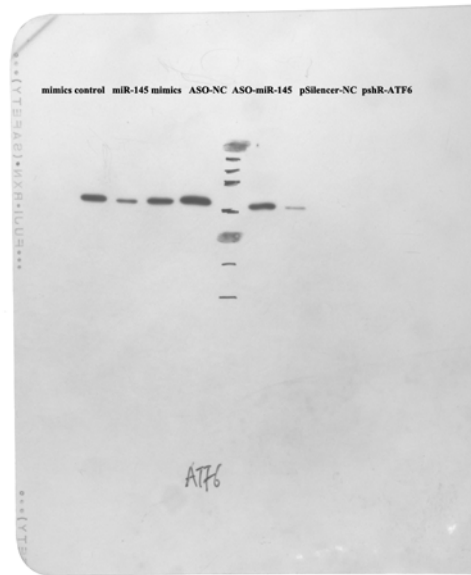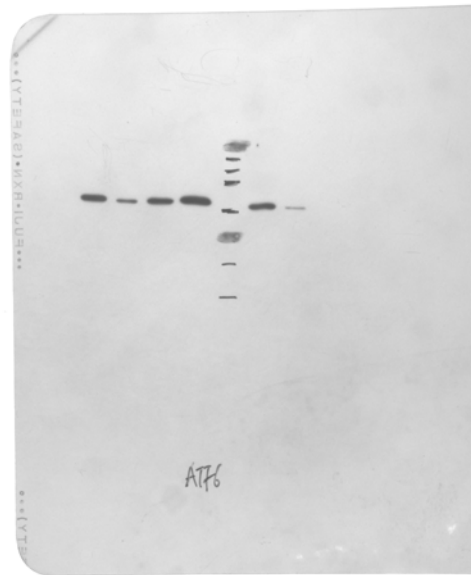

**Figure 6 GAPDH**

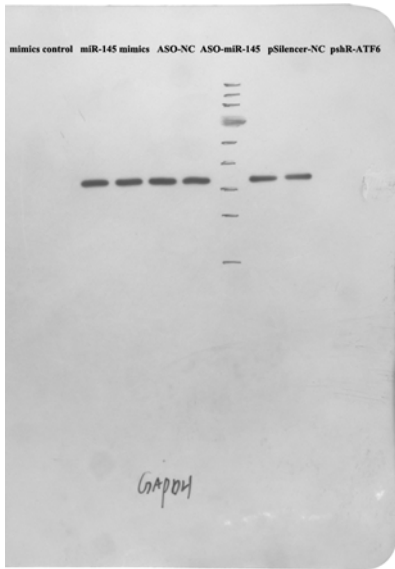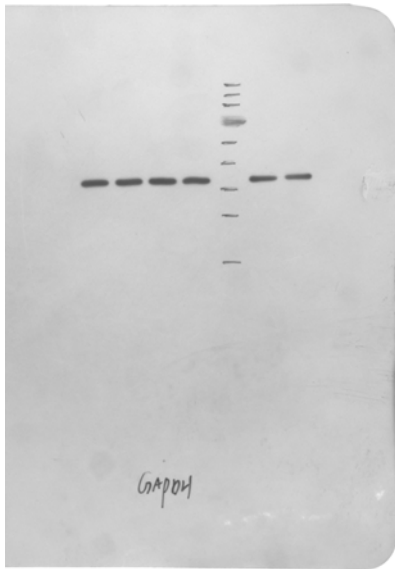

Supplement: 41598_2020_64713_MOESM2_ESM.pdf [file 41598_2020_64713_MOESM2_ESM.pdf]
